# Differential expression analysis for individual cancer samples based on robust within-sample relative gene expression orderings across multiple profiling platforms

Qingzhou Guan<sup>1</sup>, Rou Chen<sup>1</sup>, Haidan Yan<sup>1</sup>, Hao Cai<sup>1</sup>, You Guo<sup>1,2</sup>, Mengyao Li<sup>1</sup>, Xiangyu Li<sup>1</sup>, Mengsha Tong<sup>1</sup>, Lu Ao<sup>1</sup>, Hongdong Li<sup>1</sup>, Guini Hong<sup>1</sup>, Zheng Guo<sup>1</sup>

<sup>1</sup>Key Laboratory of Ministry of Education for Gastrointestinal Cancer, Department of Bioinformatics, Fujian Medical University, Fuzhou, 350001, China

<sup>2</sup>Department of Preventive Medicine, School of Basic Medicine Sciences, Gannan Medical University, Ganzhou, 341000, China

**Correspondence to:** Zheng Guo, **email:** guoz@ems.hrbmu.edu.cn  
Guini Hong, **email:** hongguini08@gmail.com

**Keywords:** gene expression profiling, multiple platforms, differentially expressed genes, heterogeneity of cancer, individual level

**Received:** February 23, 2016

**Accepted:** August 09, 2016

**Published:** September 13, 2016

## ABSTRACT

The highly stable within-sample relative expression orderings (REOs) of gene pairs in a particular type of human normal tissue are widely reversed in the cancer condition. Based on this finding, we have recently proposed an algorithm named *RankComp* to detect differentially expressed genes (DEGs) for individual disease samples measured by a particular platform. In this paper, with 461 normal lung tissue samples separately measured by four commonly used platforms, we demonstrated that tens of millions of gene pairs with significantly stable REOs in normal lung tissue can be consistently detected in samples measured by different platforms. However, about 20% of stable REOs commonly detected by two different platforms (e.g., Affymetrix and Illumina platforms) showed inconsistent REO patterns due to the differences in probe design principles. Based on the significantly stable REOs (FDR<0.01) for normal lung tissue consistently detected by the four platforms, which tended to have large rank differences, *RankComp* detected averagely 1184, 1335 and 1116 DEGs per sample with averagely 96.51%, 95.95% and 94.78% precisions in three evaluation datasets with 25, 57 and 58 paired lung cancer and normal samples, respectively. Individualized pathway analysis revealed some common and subtype-specific functional mechanisms of lung cancer. Similar results were observed for colorectal cancer. In conclusion, based on the cross-platform significantly stable REOs for a particular normal tissue, differentially expressed genes and pathways in any disease sample measured by any of the platforms can be readily and accurately detected, which could be further exploited for dissecting the heterogeneity of cancer.

## INTRODUCTION

Recently, we have reported an interesting biological phenomenon that the within-sample relative expression orderings (REOs) of gene pairs in a particular type of normal tissue are highly stable but widely reversed in the corresponding cancer tissue. Based on this finding, we have developed an algorithm, named *RankComp* [1], to identify differentially expressed genes (DEGs) and deregulated pathways in each disease tissue in comparison with its own previously normal state by exploiting the

reversal REO patterns of this disease sample [1]. Totally different from the traditional population-level case-control comparison methods, such as T-Test [2], SAM [3], Limma [4] and RanProd [5], the individual-level analysis can capture the heterogeneity of cancer and help us study cancer subtype-specific mechanisms and develop cancer prognostic biomarkers [6]. Especially, *RankComp* is an economic and efficient method which can identify DEGs for individual disease samples measured by different laboratories by fully using previously accumulated gene expression data of normal samples [1].

It is well known that gene expression profiling is susceptible to various technical artifacts or ‘batch effects’ introduced by differences in laboratory conditions, reagent lots and personals [7–13], especially when studies have to be carried out over a long period of time or when clinical specimens originate from different hospitals [9]. Current batch effect adjustment or data normalization algorithms, such as DWD [8], XPN [14], PAMR [15], SVA [16] and EB [17], are usually inadequate and may even distort the real biological signals [18, 19]. In contrast, because the within-sample REOs of gene pairs are insensitive to experimental batch effects [20–22], the application of *RankComp* obviates the need of batch effect adjustment and inter-sample normalization. As validated in our previous studies, the within-sample REOs are highly reproducible and comparable between data produced by different laboratories using the same or similar platforms [1, 6]. However, the within-sample REOs may be subject to a certain degree of uncertainty in samples measured by different platforms due to the differences in probe design principles. Thus, it is necessary to further evaluate the cross-platform properties of within-sample REOs in order to extend the application scope of the individual-level differential expression analysis. Another problem of the current *RankComp* algorithm is that it is based on REOs that are highly stable in a pre-defined percentage (e.g., 99%) of normal samples, which is lack of statistical control and may limit the detection power of DEGs in individual samples. Thus, it is also necessary to evaluate the performance of *RankComp* when using significantly stable gene pairs, selected with statistical control rather than a pre-defined percentage, in a particular type of normal tissue as the basis for the individual-level differential expression analysis.

In this article, we firstly compared gene expression profiles generated with four commonly used gene expression profiling platforms (Affymetrix, Illumina, Agilent microarray platforms and a RNA-sequencing platform) for normal lung and colorectal tissues, respectively. For each type of normal tissue, we showed that tens of millions of gene pairs with significantly stable REOs, especially those with large expression differences, can be consistently detected in samples measured by different platforms. Then, we showed that, comparing with *RankComp* based on gene pairs with highly stable REOs in at least 99% normal samples, *RankComp* based on significantly stable REOs in normal samples can detect much more DEGs for each disease sample with slightly decrease of precision. Finally, based on the individual-level differential expression analysis, we applied the individual-level pathway analysis to reveal some common and subtype-specific functional mechanisms of lung adenocarcinoma and colon adenocarcinoma, respectively.

## RESULTS

### Significantly stable REOs in normal samples measured by four platforms

For a particular type of normal tissue, we focused on evaluating the consistency between the within-sample relative expression orderings (REOs) in samples separately measured by four platforms, including three commonly used microarray platforms (Affymetrix, Illumina, Agilent) and a RNA-sequencing platform. All the data used in this study are described in Table 1 and the flowchart of the analysis procedure is described in Figure 1.

Firstly, for the Affymetrix platform, we collected a set of 150 normal lung tissue samples from four datasets (GSE19804, GSE18842, GSE27262 and GSE31210) and another set of 65 normal lung tissue samples from the GSE19188 dataset, referred to as SetA and SetB, respectively. From SetA and SetB, 197,546,446 and 195,767,556 significantly stable REOs (binomial test,  $FDR < 0.01$ ) were identified, respectively. The two lists of significantly stable REOs had 190,118,028 overlaps, among which 98% showed the same REO patterns in SetA and SetB, indicating that the significantly stable REOs of gene pairs were highly reproducible (binomial test,  $p < 1.0 \times 10^{-16}$ ). As shown in Table 2, 94.34% of the significantly stable REOs for SetA with 150 samples could be found in SetB with 65 samples, and 95.19% of the significantly stable REOs for SetB could be found in SetA. To further evaluate the sample size required for detecting significantly stable REOs, we resettled the GSE31210 dataset with 20 samples as SetB’ and all the other 195 samples as SetA’ and found that 88.50% of the significantly stable REOs found in SetA’ could be found in SetB’. Similar results were observed in the normal lung tissue samples measured by the Illumina and Agilent platforms, respectively, as described in Table 2. Especially, for the data measured by the Agilent platform, 89.06% of the significantly stable REOs found in SetA with 58 samples could be found in SetB with 24 samples. For the data measured by the Illumina platform, 78.33% of the significantly stable REOs detected from SetA with 60 samples could be found in SetB with only 13 samples. Similar results were observed for the normal colorectal tissue, as described in Table 2.

Notably, for both the normal lung and colorectal tissue, the gene pairs with significantly stable REOs found in each dataset involved all genes measured by the corresponding platform. For each type of tissue, when combining all the samples measured by a platform, above 80% of all the possible gene pairs were significantly stable ( $FDR < 0.01$ ), as shown in Figure 2. In addition, above 80% of the significantly stable REOs detected in the combined data measured by a platform could be found with a relatively small sample size (about 20 samples), as described in Supplementary Table S1.

**Table 1: Description of normal sample data and paired cancer-normal sample data used in this study**

|                                                                                        | <b>GEO Acc or Data source</b> | <b>Platform</b>        | <b>Normal sample size<sup>a</sup></b> | <b>Tumor sample size</b> |
|----------------------------------------------------------------------------------------|-------------------------------|------------------------|---------------------------------------|--------------------------|
| <b>The normal sample data for REO evaluation</b>                                       |                               |                        |                                       |                          |
| <b>Lung</b>                                                                            |                               |                        |                                       |                          |
| SetA                                                                                   | GSE19804                      | Affymetrix GPL570      | 60                                    |                          |
|                                                                                        | GSE18842                      | Affymetrix GPL570      | 45                                    |                          |
|                                                                                        | GSE27262                      | Affymetrix GPL570      | 25                                    |                          |
|                                                                                        | GSE31210                      | Affymetrix GPL570      | 20                                    |                          |
| SetB                                                                                   | GSE19188                      | Affymetrix GPL570      | 65                                    |                          |
| SetA                                                                                   | GSE32863                      | Illumina GPL6884       | 58                                    |                          |
| SetB                                                                                   | GSE31267                      | Illumina GPL6947       | 24                                    |                          |
| SetA                                                                                   | GSE40588                      | Agilent GPL6480        | 60                                    |                          |
| SetB                                                                                   | GSE15197                      | Agilent GPL6480        | 13                                    |                          |
|                                                                                        | GSE57148 <sup>b</sup>         | Illumina GPL11154      | 91                                    |                          |
| <b>Colorectal</b>                                                                      |                               |                        |                                       |                          |
| SetA                                                                                   | GSE21510                      | Affymetrix GPL570      | 25                                    |                          |
|                                                                                        | GSE18105                      | Affymetrix GPL570      | 17                                    |                          |
|                                                                                        | GSE4107                       | Affymetrix GPL570      | 10                                    |                          |
| SetB                                                                                   | GSE8671                       | Affymetrix GPL570      | 32                                    |                          |
| SetA                                                                                   | GSE56789                      | Illumina GPL10558      | 40                                    |                          |
| SetB                                                                                   | GSE31279                      | Illumina GPL6104       | 32                                    |                          |
|                                                                                        | GSE43841                      | Illumina GPL14951      | 6                                     |                          |
| SetA                                                                                   | GSE46271                      | Agilent GPL14550       | 22                                    |                          |
|                                                                                        | GSE50114                      | Agilent GPL6480        | 9                                     |                          |
| SetB                                                                                   | GSE28000                      | Agilent GPL4133        | 23                                    |                          |
|                                                                                        | GSE50760 <sup>b</sup>         | Illumina GPL11154      | 18                                    |                          |
| <b>The paired cancer-normal sample data for the performance of RankComp evaluation</b> |                               |                        |                                       |                          |
| <b>Lung</b>                                                                            |                               |                        |                                       |                          |
|                                                                                        | GSE27262                      | Affymetrix GPL570      | 25                                    | 25                       |
|                                                                                        | GSE32863                      | Illumina GPL6884       | 57                                    | 57                       |
|                                                                                        | TCGA_luad <sup>b</sup>        | IlluminaHiSeq_RNASeqV2 | 58                                    | 58                       |
| <b>Colorectal</b>                                                                      |                               |                        |                                       |                          |
|                                                                                        | GSE8671                       | Affymetrix GPL570      | 32                                    | 32                       |
|                                                                                        | GSE31279                      | Illumina GPL6104       | 32                                    | 32                       |
|                                                                                        | TCGA_coad <sup>b</sup>        | IlluminaHiSeq_RNASeqV2 | 26                                    | 26                       |

Note: <sup>a</sup>To determine stable gene pairs for a particular type of normal tissue, only the normal sample sizes were described for the datasets. <sup>b</sup>Denotes mRNA\_seq data, especially TCGA\_luad and TCGA\_coad denote paired lung adenocarcinoma and colon adenocarcinoma samples from TCGA, respectively.

The above results together indicated that the REOs of gene pairs are widely stable in a particular type of human normal tissue and most of them could be found with only about 20 samples.

### Cross-platform significantly stable REOs in normal tissue samples

Then, we evaluated the consistency between the significantly stable REOs detected by different platforms. For each of the three microarray platforms, we defined the REOs consistently detected in SetA and SetB measured by the platform for a type of normal tissue as the stable REOs of the platform for this type of normal tissue. Especially, we only analyzed the gene pairs consisting of genes commonly detected by all the four platforms.

For the 94,145,902 significantly stable REOs detected from the normal lung tissue samples measured by the Affymetrix platform, 85.50% were also detected from the data measured by the Illumina platform, among which 82.37% showed the same REO patterns in the samples measured by the two platforms (binomial test,  $p < 1.0 \times 10^{-16}$ ). For the 66,305,728 significantly stable REOs

consistently detected by the above two platforms, 79.91% were included in the 77,825,426 significantly stable REOs found in the data measured by the Agilent platform and the consistency increased to 92.1%. Furthermore, for the 48,802,858 significantly stable REOs consistently detected by the three microarray platforms, 98.01% were included in the 99,202,212 significantly stable REOs (binomial test,  $FDR < 0.01$ ) detected by the RNA-sequencing platform and the consistency further increased to 96.79%. Totally 46,295,854 gene pairs with significantly stable REOs ( $FDR < 0.01$ ) were consistently detected by the four platforms for the normal lung samples. Similar results were also observed for normal colorectal tissue, as described in Table 3.

The above results indicated that the cross-platform ability of significantly stable REOs increases as the significantly stable REOs can be consistently detected in increasing number of platforms. A possible explanation could be that the REOs kept across multiple platforms with different probe design principles tend to have large rank differences which are difficult to be reversed by the probe detection biases of various platforms. To illustrate this possibility, for the significantly stable REOs

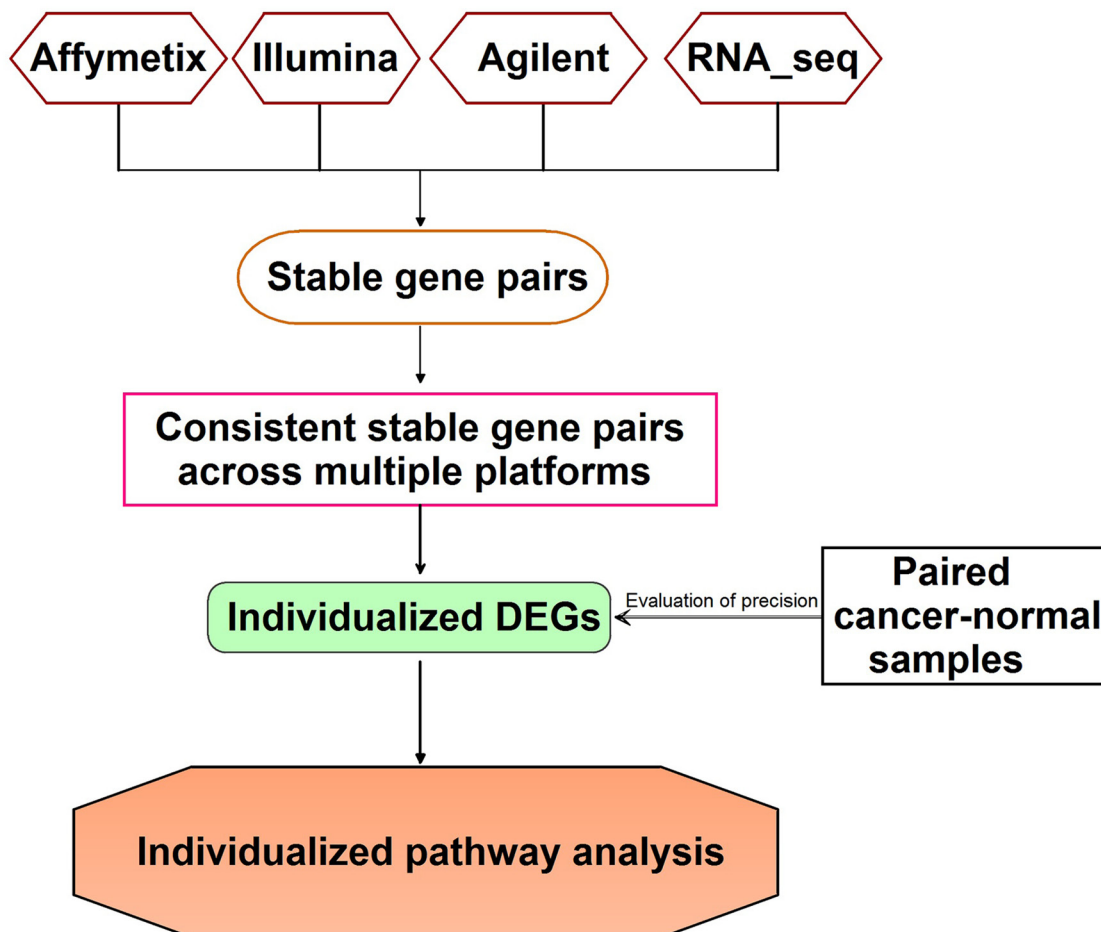

Figure 1: The flowchart of the analysis procedure.

**Table 2: Reproducibility of significantly stable REOs in normal samples measured by each of the platforms**

|                   | Label | Normal sample size | Gene# | Number of stable REOs | Number of overlaps | POG <sub>12</sub> | POG <sub>21</sub> | Consistency | P       |
|-------------------|-------|--------------------|-------|-----------------------|--------------------|-------------------|-------------------|-------------|---------|
| <b>Lung</b>       |       |                    |       |                       |                    |                   |                   |             |         |
| Affymetrix        | SetA  | 150                | 20283 | 197,546,446           | 190,118,028        | 0.9434            | 0.9519            | 0.9802      | <1.0-16 |
|                   | SetB  | 65                 |       | 195,767,556           |                    |                   |                   |             |         |
| Illumina          | SetA  | 58                 | 23364 | 251,964,302           | 231,498,834        | 0.8906            | 0.9061            | 0.9694      | <1.0-16 |
|                   | SetB  | 24                 |       | 247,667,868           |                    |                   |                   |             |         |
| Agilent           | SetA  | 60                 | 19596 | 181,534,752           | 151,185,241        | 0.7833            | 0.9105            | 0.9406      | <1.0-16 |
|                   | SetB  | 13                 |       | 156,176,364           |                    |                   |                   |             |         |
| <b>Colorectal</b> |       |                    |       |                       |                    |                   |                   |             |         |
| Affymetrix        | SetA  | 52                 | 20283 | 193,475,574           | 184,134,774        | 0.9136            | 0.9135            | 0.96        | <1.0-16 |
|                   | SetB  | 32                 |       | 193,501,698           |                    |                   |                   |             |         |
| Illumina          | SetA  | 40                 | 17789 | 148,902,375           | 131,019,285        | 0.8048            | 0.8723            | 0.9147      | <1.0-16 |
|                   | SetB  | 38                 |       | 137,385,589           |                    |                   |                   |             |         |
| Agilent           | SetA  | 31                 | 18583 | 145,935,881           | 121,390,845        | 0.8099            | 0.87              | 0.9736      | <1.0-16 |
|                   | SetB  | 23                 |       | 135,855,195           |                    |                   |                   |             |         |

Note:#denotes the number of genes of SetA and setB measured by a particular platform. POG<sub>12</sub> (or POG<sub>21</sub>) denotes the percentage of the significantly stable gene pairs (FDR<0.01) detected from SetA (or SetB) that are consistently detected in SetB (or SetA). Consistency denotes the percentage of overlapped gene pairs that display the same REO patterns between SetA and SetB and P denotes the significance of the consistency.

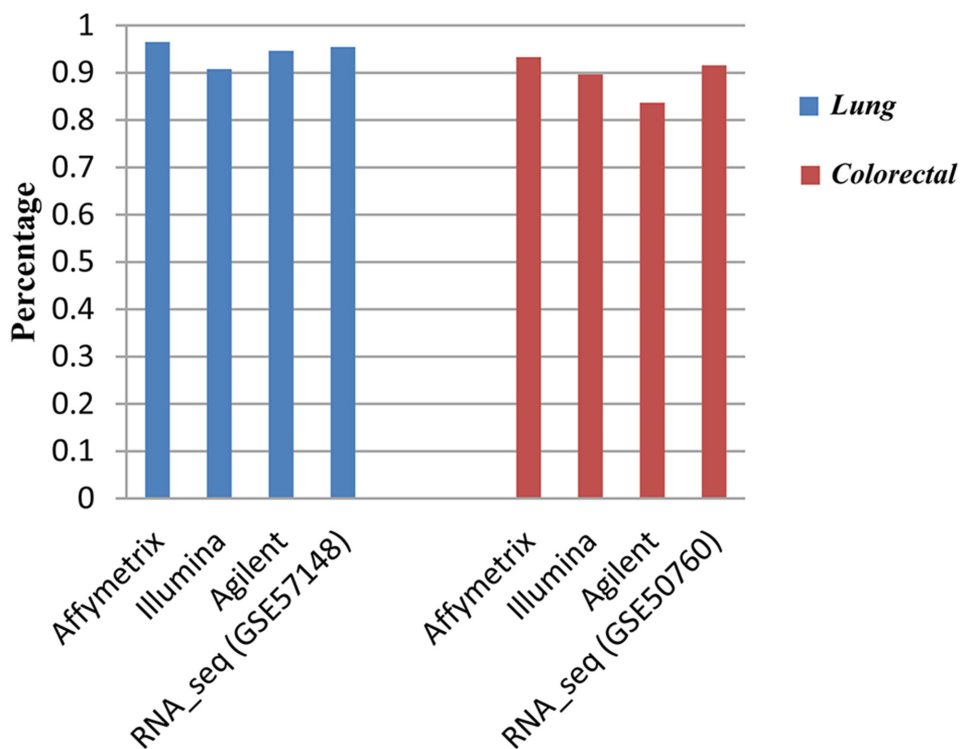

**Figure 2: The percentage of the gene pairs with significantly stable REOs (FDR<0.01) in all measured gene pairs.**

**Table 3: Cross-platform evaluation of the significantly REOs for normal tissues**

|                    | Number of stable REOs | Number of overlaps | POG <sub>12</sub> | POG <sub>21</sub> | Consistency | P       |
|--------------------|-----------------------|--------------------|-------------------|-------------------|-------------|---------|
| <b>lung</b>        |                       |                    |                   |                   |             |         |
| Affymetrix         | 94,145,902            | 80,493,915         | 0.7043            | 0.7471            | 0.8237      | <1.0-16 |
| Illumina           | 88,746,864            |                    |                   |                   |             |         |
| Affy_Illu          | 66,305,728            | 52,986,997         | 0.736             | 0.6271            | 0.921       | <1.0-16 |
| Agilent            | 77,825,426            |                    |                   |                   |             |         |
| Affy_Illu_Agi      | 48,802,858            | 47,832,844         | 0.9486            | 0.4667            | 0.9679      | <1.0-16 |
| RNA_seq (GSE57148) | 99,202,212            |                    |                   |                   |             |         |
| <b>Colorectal</b>  |                       |                    |                   |                   |             |         |
| Affymetrix         | 100,855,012           | 78,495,790         | 0.6729            | 0.7569            | 0.8645      | <1.0-16 |
| Illumina           | 89,653,488            |                    |                   |                   |             |         |
| Affy_Illu          | 67,862,351            | 52,201,960         | 0.7347            | 0.6223            | 0.9551      | <1.0-16 |
| Agilent            | 80,116,625            |                    |                   |                   |             |         |
| Affy_Illu_Agi      | 49,856,959            | 48,851,749         | 0.9662            | 0.4453            | 0.9861      | <1.0-16 |
| RNA_seq (GSE50670) | 108,187,244           |                    |                   |                   |             |         |

Note: Affy\_Illu denotes stable gene pairs consistently detected from the data measured by Affymetrix and Illumina platforms. Similarly, Affy\_Illu\_Agi denotes stable gene pairs consistently detected from the data measured by Affymetrix, Illumina and Agilent platforms.

commonly detected by the Affymetrix and Illumina platforms for normal lung tissue, we compared the rank differences between the gene pairs with consistent REOs and the gene pairs with inconsistent REOs detected by the two platforms using the GSE19188 dataset. As expected, the median of the rank differences of gene pairs with consistent REOs was 6855, which was significantly larger than that (median=3144) of the gene pairs with inconsistent REOs (Wilcoxon rank sum test,  $p < 1.0-16$ ).

In summary, for a particular type of human normal tissue, significantly stable within-sample REOs especially for gene pairs with large expression differences are largely consistent across samples measured by different platforms.

### Individualized DEGs detection based on cross-platform significantly stable REOs

As described above, totally 46,295,854 gene pairs with significantly stable REOs ( $FDR < 0.01$ ) were consistently detected in the normal lung samples separately measured by the four platforms. Based on these significantly stable REOs, we applied *RankComp* [1] to detect differentially expressed genes (DEGs) in a given cancer sample compared with its own previously (usually unknown) normal state. The detail of the *RankComp* algorithm was described in [1] and briefly in the METHODS section. We evaluated the performance of *RankComp* using cancer samples with paired

adjacent normal samples, assuming that the previously normal state of a cancer tissue could be approximately represented by the adjacent normal tissue of the cancer tissue. After identifying DEGs for each cancer sample, we evaluated the precision of DEGs identified for this cancer sample using the observed expression differences (up- or down-regulations) between the cancer sample and the paired adjacent normal sample as the benchmark (see Methods). Considering that other individual-specific factors irrelevant to the cancer condition may induce transcriptional alternations in the cancer sample, we focused on individualizing the population-level DEGs predetermined to ensure the DEGs identified in individual cancer samples to be associated with cancer. We also evaluated the performance of *RankComp* for individualized differential expression analysis based on the highly stable REOs (stable in at least 99% of the samples) consistently detected in the normal lung and colorectal tissue samples measured by the four platforms, respectively.

For lung cancer, using the GSE19188 and GSE19804 datasets, we firstly detected 12,359 and 8,681 DEGs (Student's t-test,  $FDR < 0.01$ ) between the cancer and normal tissues, respectively. The two lists of DEGs had 6,929 overlaps, among which 98.46% showed the same deregulation directions in the cancer tissues in the two datasets (binomial test,  $p < 1.0-16$ ). We defined the 6,822 reproducible DEGs as the population-level DEGs for lung

cancer. Then, using three datasets with paired lung cancer and adjacent normal samples separately measured by three different platforms, we evaluated the performance of *RankComp* in individualizing the population-level DEGs. For each cancer sample, we performed *RankComp* based on the 46,295,854 gene pairs with significantly stable REOs (FDR<0.01) consistently detected in the normal lung samples measured by the four platforms. For the 25 lung cancer samples of the GSE27262 dataset measured by the Affymetrix platform, *RankComp* identified averagely 1,184 DEGs per sample with averagely 96.51% precision according to the observed expression differences between the cancer samples and their paired adjacent normal samples. We also evaluated *RankComp* using the GSE32863 and TCGA-luad (lung adenocarcinoma samples from TCGA) datasets which included 57 and 58 paired cancer and adjacent normal samples measured by the Illumina microarray platform and the Illumina HiSeq 2000 platform, respectively. Averagely 1,335 and 1,116 DEGs were identified per cancer sample and the average precisions were 95.95% and 94.78% for the two datasets, respectively. In contrast, based on the 21,789,916 highly stable REOs (stable in at least 99% of the samples) consistently detected in the normal lung samples measured by the four platforms, the average precision increased to 98.96%, 98.97 % and 95.65% but averagely only 392, 542 and 474 DEGs were identified per sample in the three datasets, respectively. Similar results were also observed for colorectal cancer, as shown in Figure 3.

The above results showed that *RankComp* based on significantly stable REOs exhibited greatly enhanced detection power at the cost of slightly decrease of precision, compared with *RankComp* based on highly stable REOs.

### Individualized pathway analysis based on individualized DEGs

After identifying DEGs for a disease sample, we can detect deregulated pathways for this disease sample. Here, we analyzed all the 515 lung adenocarcinoma samples and the 285 colon adenocarcinoma samples documented in TCGA to illustrate this application.

First, we detected pathways separately enriched with up- or down-regulated genes for each of the 515 lung adenocarcinoma samples (hypergeometric test, FDR<0.1) [23]. As shown in Figure 4A, some well-known cancer pathways could be commonly altered in lung adenocarcinoma samples. For examples, the ‘Osteoclast differentiation’ [24] and ‘TNF signaling’ [25] significantly enriched with down-regulated genes in about 60% of the 515 samples (FDR<0.1) and the coverage increased to above 90% with a looser significance threshold of  $p<0.05$ . In addition, the ‘Cell cycle’ [26] pathway significantly enriched with up-regulated genes in about 75% or 90% (with FDR<0.1 or  $p<0.05$ ) of the 515 samples. In contrast, some pathways could be subtype-specific. For example, the ‘Fanconi anemia pathway’ significantly enriched with

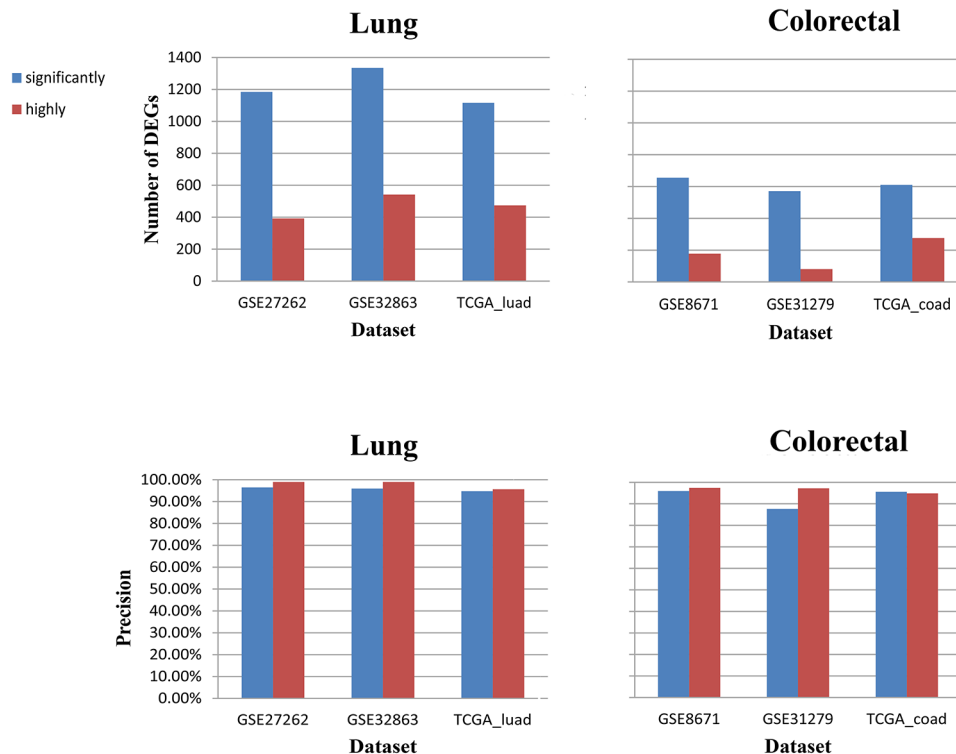

**Figure 3: *RankComp* based on significantly stable REOs can detect much more DEGs with slightly decreased precision for each disease sample than *RankComp* based on highly stable REOs (stable in above 99% samples).**

up-regulated genes in about 20% or 65% (with  $FDR < 0.1$  or  $p < 0.05$ ) of the 515 samples, indicating that it might be associated with cancer prognosis [27]. For another example, the ‘Chemokine signaling pathway’ significantly enriched with down-regulated genes in about 18% or 77% (with  $FDR < 0.1$  or  $p < 0.05$ ) of the 515 lung cancer samples, indicating that it might also be associated with cancer prognosis [28].

Similarly, we performed pathway enrichment analysis for each of the 285 colon adenocarcinoma

samples. As shown in Figure 4B, two pathways (‘oxidative phosphorylation’ and ‘metabolic pathway’) were significant in all the 285 samples with  $FDR < 0.1$  and another five pathways (‘Mineral absorption’, ‘Cardiac muscle contraction’, ‘Fatty acid degradation’, ‘Nitrogen metabolism’ and ‘Peroxisome’) were also significant in above 90% of the 285 samples when defined with a looser significance threshold ( $p < 0.05$ ). Thus, these pathways, such as the ‘metabolic’ [29] and ‘oxidative phosphorylation’ [30] pathways, could be commonly

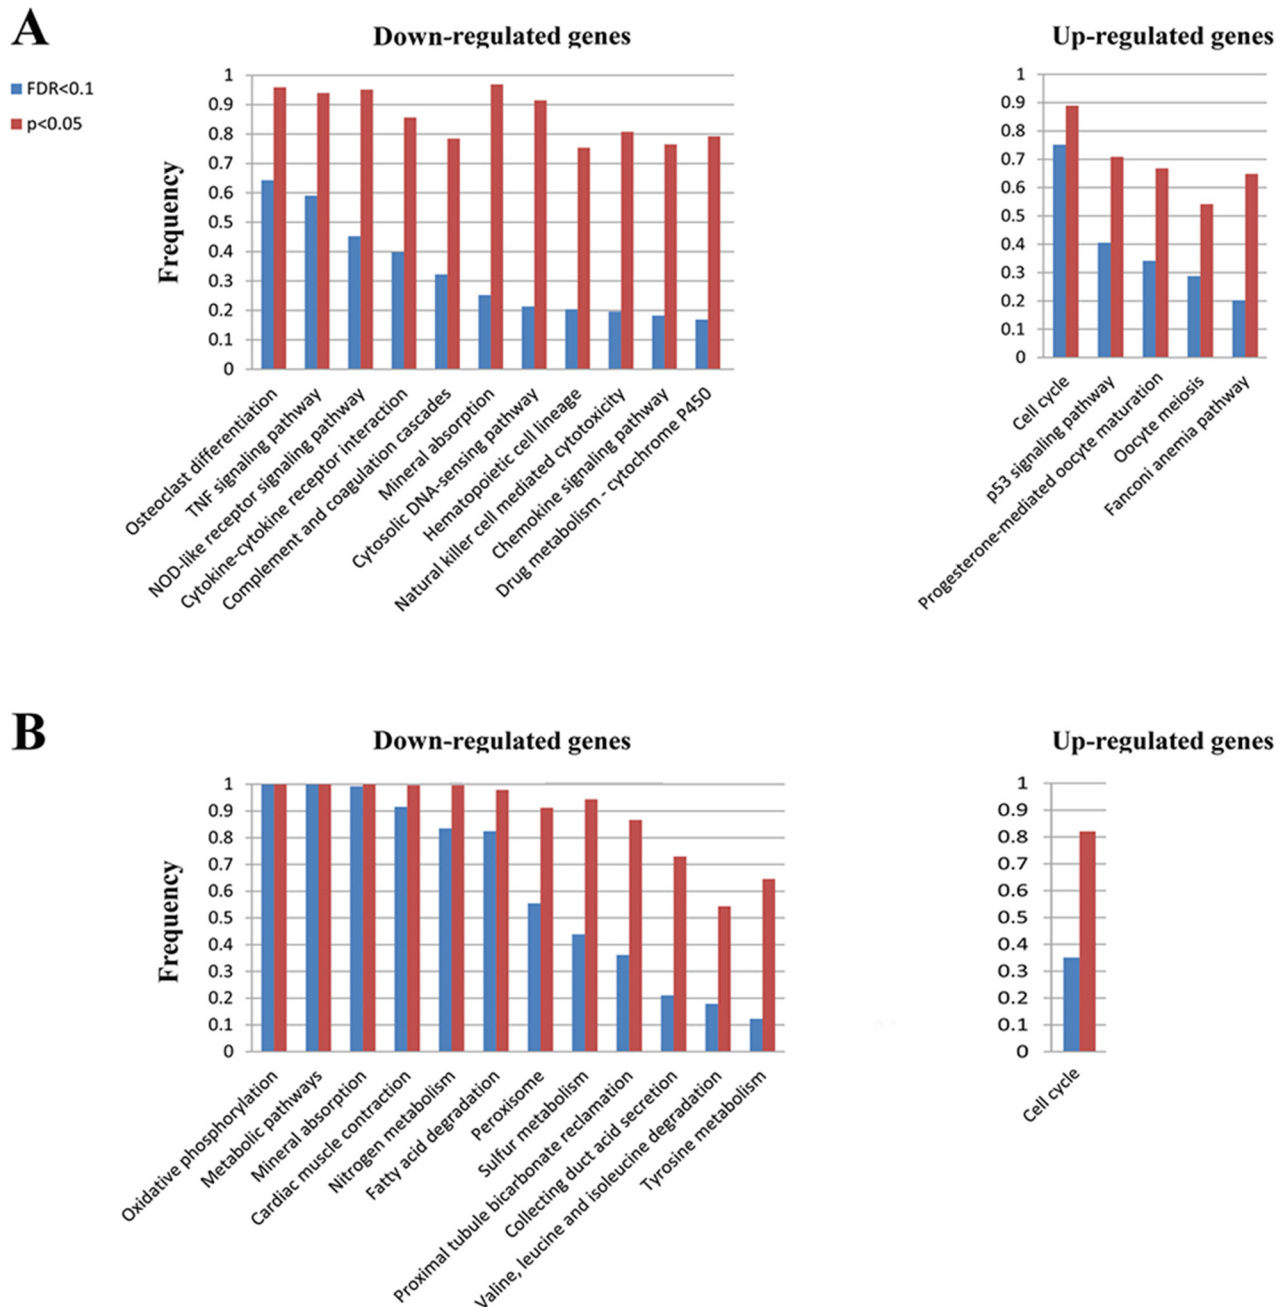

Figure 4: The KEGG pathways separately enriched with up- and down-regulated genes in at least 10% of the TCGA lung adenocarcinoma samples A. and the TCGA colon adenocarcinoma samples B.



altered in colon cancer. In contrast, some other pathways such as ‘valine, leucine and isoleucine degradation’ [31] and ‘Tyrosine metabolism’ [32] pathways could be subtype-specific and thus could be associated with cancer prognosis. Especially, with  $p < 0.05$ , the ‘Cell cycle’ pathway significantly enriched with up-regulated genes in 89% of the 515 lung adenocarcinoma and in 82% of the 285 colon adenocarcinoma samples, indicating that this pathway might be commonly deregulated in cancer [33]. In addition, the ‘Mineral absorption’ pathway significantly enriched with down-regulated genes in 97% of the 515 lung adenocarcinoma and in 100% of the 285 colon adenocarcinoma samples, indicating that this pathway might also be commonly deregulated in cancer [34, 35].

The above results suggested that individualized pathway analysis could provide hints for revealing common and subtype-specific functional mechanisms of cancer. The functional analysis results also provided extra evidence for the authenticity of individualized DEGs at the functional level.

## DISCUSSION

As demonstrated in this article, tens of millions of gene pairs with significantly stable REOs in a particular type of normal tissue, especially those with large expression differences, can be consistently detected by different platforms. This provides the basis for individual-level differential expression analysis for cancer samples measured by different platforms. Compared with *RankComp* based on highly stable REOs (e.g., stable in above 99% samples), *RankComp* based on significantly stable REOs can detect much more DEGs with slightly decrease of precision for each disease sample, as demonstrated by the results for both lung cancer and colorectal cancer. Individual-level DEGs analysis naturally enables us to perform pathway analysis at the individual level, which could reveal common functional mechanisms as well as subtype-specific functional mechanisms of cancer. This is totally different from the traditional population-level pathway analysis which cannot discriminate whether a significant pathway is altered in a group of patients (i.e., a subtype) or all patients. Furthermore, our results showed that almost all gene pairs had significantly stable REOs across samples for a given normal tissue. This indicated that the relative ordering of gene expression is overall stable in a particular type of normal human tissue, indicating that genes may need to express in a comprehensive coordination structure to carry normal function systematically [1].

Based on the significantly stable REOs consistently detected by multiple platforms for a particular type of tissue, DEGs and deregulated pathways for any disease sample measured by any of these platforms can be readily detected. This could be of particular valuable when we

need to analyze multiple datasets of disease samples measured by different platforms to identify and validate various cancer signatures (such as prognostic signatures) [36]. Moreover, for a particular normal tissue, our result showed that, the significantly stable REOs consistently detected in more platforms tend to be more likely to remain consistent in a new platform. Especially, almost all (above 97%) significantly stable REOs consistently detected (binomial test,  $FDR < 0.01$ ) by the three microarray platforms could be reproducibly found by the RNA-sequencing platform. This might be helpful for analyzing disease samples measured by a less commonly used platforms when no or insufficient normal samples are measured by the platform for determining the stable REOs for this platform. Notably, a major limitation of selecting cross-platform stable REOs is that many truly stable REOs could be lost. As shown in Table 3, about half of the stable REOs detected by a particular platform will be lost when screening the stable REOs from samples measured by the four platforms for lung and colorectal tissue. Although our results indicated that it might be sufficient to detect DEGs based on the cross-platform stable REOs, the effects of using a certain percentage of stable REOs on the DEGs detection power need to be further studied.

In summary, a large fraction of the widely stable REOs in a particular type of normal tissue can be consistently detected in samples measured by different platforms. By fully using previously accumulated gene expression data of normal samples, *RankComp* is an economic and efficient method which can identify DEGs for individual disease samples measured by different platforms. Moreover, the individual-level analysis of DEGs can also provide the possibility to identify robust diagnostic and prognostic biomarker for precision medicine [36].

## MATERIALS AND METHODS

### Data and preprocessing

The gene expression profiles analyzed in this study are described in Table 1. The data generated with three commonly used microarray platforms (Affymetrix, Illumina, Agilent) were downloaded from Gene Expression Omnibus [37] (GEO, <http://www.ncbi.nlm.nih.gov/geo/>) and the mRNA-seq data measured by RNA-sequencing platform were downloaded from GEO and TCGA [38] (<http://cancergenome.nih.gov/>).

For the data measured by the Affymetrix platform, we downloaded the raw mRNA expression data (.CEL files) and used the Robust Multi-array Average algorithm for background adjustment [39]. For the data measured by the Illumina platform, we directly downloaded the processed data. For the data measured by the Agilent platform, we downloaded the raw fluorescent

signal intensities data of the channel (gMedianSignal or rMedianSignal) for normal samples and used the intensities to minus the corresponding background signal intensities as the probe-expression matrix. Especially, for the data of TCGA, we directly downloaded the expression data of level 3.

For array-based data, each probeset ID was mapped to Entrez gene ID with the corresponding platform file. If a probeset was mapped to multiple or zero gene, then the data of this probeset was deleted. If multiple probesets were mapped to the same gene, the expression value for the gene was defined as the arithmetic mean of the value of multiple probesets. For the sequence-based data form GEO, we directly downloaded the processed data and each Gene Symbol was mapped to Entrez gene ID with biological DataBase network (bioDBnet). For the sequence-based data of level 3 from TCGA, we removed genes whose expression measurements were at or below a noise threshold of 0.2 normalized counts in at least 75% of samples [40].

### Identification of significantly stable REOs in normal tissue

The REO of two genes, A and B, is denoted as A > B (or B < A) if gene A has a higher (or lower) expression level than gene B. The significance of a REO is determined by a binomial test [41] as follows:

$$p = 1 - \sum_{i=0}^{k-1} \binom{n}{i} p_0^i (1-p_0)^{n-i} \quad (1)$$

where  $n$  denotes the total number of normal samples,  $k$  denotes the number of samples that have a certain REO pattern (e.g., A > B or A < B) in  $n$  normal samples and  $p_0$  ( $p_0 = 0.5$ ) is the probability of observing a certain REO pattern in a normal sample by chance. Then, the  $p$ -values were adjusted using the Benjamini and Hochberg method [42].

### Evaluation of the reproducibility of the significantly stable REOs

We used the POG (Percentage of Overlapping Gene pairs) score [43, 44] to evaluate the reproducibility of significantly stable gene pairs identified from two independent datasets. If two lists of stable gene pairs, list 1 with length  $L_1$  and list 2 with length  $L_2$ , have  $n$  overlaps, among which  $k$  have the same REO patterns, then the POG score from list 1 (or list 2) to list 2 (or list 1), denoted as  $POG_{12}$  (or  $POG_{21}$ ), is calculated as  $k/L_1$  (or  $k/L_2$ ), and the concordance score is calculated as  $k/n$ . The probability of observing the concordance score by chance is calculated with the binomial distribution model as described above, where  $p_0$  ( $p_0 = 0.5$ ) is the probability of a gene pair having the same REO patterns in the two lists by chance.

### Performance evaluation of RankComp

The detail of the *RankComp* algorithm is described in [1]. Briefly, for each cancer sample, gene pairs with reversal ordering in comparison with their stable ordering in normal samples are firstly determined as reversal gene pairs by *RankComp*. Then, to determine whether a given gene A is differentially expressed in a given disease sample, Fisher's exact test [45] is used to test the null hypothesis that the proportion of reversal gene pairs supporting the up-regulation of gene A is equal to the proportion of gene pairs supporting its down-regulation. For a given gene A, if its ordering is significantly lower (or higher) than that of another gene in normal samples but this REO is reversed in a cancer sample, then this reversal gene pair could support up-regulation (or down-regulation) of gene A in the cancer sample. If gene A itself is not changed in expression level, the effect of the expression changes of other genes on the upward or downward shift in the rank of gene A is assumed to be a random event. Finally, a filtering process is utilized to retain only those DEGs which are still significant with Fisher's exact test after excluding their coupled gene pairs including any other DEGs.

We used paired cancer and adjacent normal samples to evaluate the performance of *RankComp*, assuming that the unknown previously normal state of a cancer tissue could be approximately represented by the adjacent normal tissue of the cancer tissue. After identifying DEGs for one cancer sample, if the deregulation directions (up- or down-regulations) of DEGs are consistent with the deregulation directions observed in the cancer sample compared with its own adjacent normal sample, then they are defined as true positives (TP); otherwise, false positives (FP). The precision rate is calculated as TP/(TP+FP) for each cancer sample. To ensure the association between the individualized DEGs and cancer, we restricted our evaluation to the reproducible population-level DEGs predetermined using two datasets for each type of cancer. For each cancer, the statistical significance of the concordance score between two lists of DEGs between cancer samples and normal controls, detected by Student's t-test, is calculated by the binomial distribution model as described above. Finally, the DEGs reproducibly detected in the two datasets for each cancer are defined as the population-level DEGs associated with the cancer.

### The KEGG pathways

Data of 223 pathways covering 6290 unique genes were extracted from the Kyoto Encyclopedia of Genes and Genomes (KEGG) [46] on 10 May 2015. The hypergeometric distribution model is used to determine the significance of biological pathways enriched with up- and down-regulated DEGs, respectively [23]. The  $p$ -values are adjusted using the Benjamini and Hochberg procedure.

## Abbreviations

REOs: relative expression orderings; DEGs: differentially expressed genes; GEO: Gene Expression Omnibus; KEGG: Kyoto Encyclopedia of Genes and Genomes; POG: Percentage of Overlapping Gene pair; FDR: False Discovery Rate; TP: true positives; FP: false positives. TCGA\_luad: lung adenocarcinoma samples from TCGA; TCGA\_coad: colon adenocarcinoma samples from TCGA.

## CONFLICTS OF INTEREST

No potential conflicts of interest were disclosed.

## GRANT SUPPORT

This work was supported by the National Natural Science Foundation of China [grant numbers. 81572935, 81372213, 81501215 and 81501829].

## REFERENCES

1. Wang H, Sun Q, Zhao W, Qi L, Gu Y, Li P, Zhang M, Li Y, Liu SL, Guo Z. Individual-level analysis of differential expression of genes and pathways for personalized medicine. *Bioinformatics*. 2015; 31:62-68.
2. Rice JA. (1995). *Mathematical Statistics and Data Analysis*. (Belmont, CA: Duxbury Press).
3. Tusher VG, Tibshirani R, Chu G. Significance analysis of microarrays applied to the ionizing radiation response. *Proceedings of the National Academy of Sciences of the United States of America*. 2001; 98:5116-5121.
4. Smyth GK. Linear models and empirical bayes methods for assessing differential expression in microarray experiments. *Statistical applications in genetics and molecular biology*. 2004; 3:Article3.
5. Breitling R, Armengaud P, Amtmann A, Herzyk P. Rank products: a simple, yet powerful, new method to detect differentially regulated genes in replicated microarray experiments. *FEBS Lett*. 2004; 573:83-92.
6. Wang H, Cai H, Ao L, Yan H, Zhao W, Qi L, Gu Y, Guo Z. Individualized identification of disease-associated pathways with disrupted coordination of gene expression. *Brief Bioinform*. 2015.
7. Leek JT, Scharpf RB, Bravo HC, Simcha D, Langmead B, Johnson WE, Geman D, Baggerly K, Irizarry RA. Tackling the widespread and critical impact of batch effects in high-throughput data. *Nature reviews Genetics*. 2010; 11:733-739.
8. Benito M, Parker J, Du Q, Wu J, Xiang D, Perou CM, Marron JS. Adjustment of systematic microarray data biases. *Bioinformatics*. 2004; 20:105-114.
9. Luo J, Schumacher M, Scherer A, Sanoudou D, Megherbi D, Davison T, Shi T, Tong W, Shi L, Hong H, Zhao C, Elloumi F, Shi W, et al. A comparison of batch effect removal methods for enhancement of prediction performance using MAQC-II microarray gene expression data. *The pharmacogenomics journal*. 2010; 10:278-291.
10. Reese SE, Archer KJ, Therneau TM, Atkinson EJ, Vachon CM, de Andrade M, Kocher JP, Eckel-Passow JE. A new statistic for identifying batch effects in high-throughput genomic data that uses guided principal component analysis. *Bioinformatics*. 2013; 29:2877-2883.
11. Es. L. Array of hope. *Nature genetics*. 1999; 21:226-229.
12. Fare TL, Coffey EM, Hongyue D, He YD, Kessler DA, Kilian KA, Koch JE, Eric LP, Marton MJ, Meyer MR. Effects of atmospheric ozone on microarray data quality. *Analytical Chemistry*. 2003; 75:4672-4675.
13. Chen C, Grennan K, Badner J, Zhang D, Gershon E, Jin L, Liu C. Removing batch effects in analysis of expression microarray data: an evaluation of six batch adjustment methods. *PloS one*. 2011; 6:e17238.
14. Shabalin AA, Tjelmeland H, Fan C, Perou CM, Nobel AB. Merging two gene-expression studies via cross-platform normalization. *Bioinformatics*. 2008; 24:1154-1160.
15. Sims AH, Smethurst GJ, Hey Y, Okoniewski MJ, Pepper SD, Howell A, Miller CJ, Clarke RB. The removal of multiplicative, systematic bias allows integration of breast cancer gene expression datasets - improving meta-analysis and prediction of prognosis. *BMC Med Genomics*. 2008; 1:42.
16. Leek JT, Storey JD. Capturing heterogeneity in gene expression studies by surrogate variable analysis. *PLoS genetics*. 2007; 3:1724-1735.
17. Johnson WE, Li C, Rabinovic A. Adjusting batch effects in microarray expression data using empirical Bayes methods. *Biostatistics*. 2007; 8:118-127.
18. Wang D, Cheng L, Wang M, Wu R, Li P, Li B, Zhang Y, Gu Y, Zhao W, Wang C, Guo Z. Extensive increase of microarray signals in cancers calls for novel normalization assumptions. *Comput Biol Chem*. 2011; 35:126-130.
19. Nygaard V, Rodland EA, Hovig E. Methods that remove batch effects while retaining group differences may lead to exaggerated confidence in downstream analyses. *Biostatistics*. 2016; 17:29-39.
20. Geman D, d'Avignon C, Naiman DQ, Winslow RL. Classifying gene expression profiles from pairwise mRNA comparisons. *Statistical applications in genetics and molecular biology*. 2004; 3:Article19.
21. Tan AC, Naiman DQ, Xu L, Winslow RL, Geman D. Simple decision rules for classifying human cancers from gene expression profiles. *Bioinformatics*. 2005; 21:3896-3904.
22. Heinaniemi M, Nykter M, Kramer R, Wienecke-Baldacchino A, Sinkkonen L, Zhou JX, Kreisberg R, Kauffman SA, Huang S, Shmulevich I. Gene-pair expression signatures reveal lineage control. *Nature methods*. 2013; 10:577-583.

23. Hong G, Zhang W, Li H, Shen X, Guo Z. Separate enrichment analysis of pathways for up- and downregulated genes. *Journal of the Royal Society, Interface*. 2014; 11:20130950.
24. Schramek D, Leibbrandt A, Sigl V, Kenner L, Pospisilik JA, Lee HJ, Hanada R, Joshi PA, Aliprantis A, Glimcher L, Pasparakis M, Khokha R, Ormandy CJ, Widschwendter M, Schett G, Penninger JM. Osteoclast differentiation factor RANKL controls development of progestin-driven mammary cancer. *Nature*. 2010; 468:98-102.
25. Shih CM, Lee YL, Chiou HL, Chen W, Chang GC, Chou MC, Lin LY. Association of TNF-alpha polymorphism with susceptibility to and severity of non-small cell lung cancer. *Lung cancer*. 2006; 52:15-20.
26. Vermeulen K, Van Bockstaele DR, Berneman ZN. The cell cycle: a review of regulation, deregulation and therapeutic targets in cancer. *Cell proliferation*. 2003; 36:131-149.
27. Marsit CJ, Liu M, Nelson HH, Posner M, Suzuki M, Kelsey KT. Inactivation of the Fanconi anemia/BRCA pathway in lung and oral cancers: implications for treatment and survival. *Oncogene*. 2004; 23:1000-1004.
28. Shi L, Zhang B, Sun X, Zhang X, Lv S, Li H, Wang X, Zhao C, Zhang H, Xie X, Wang Y, Zhang P. CC chemokine ligand 18(CCL18) promotes migration and invasion of lung cancer cells by binding to Nir1 through Nir1-ELMO1/DOC180 signaling pathway. *Mol Carcinog*. 2016.
29. Bi X, Lin Q, Foo TW, Joshi S, You T, Shen HM, Ong CN, Cheah PY, Eu KW, Hew CL. Proteomic analysis of colorectal cancer reveals alterations in metabolic pathways: mechanism of tumorigenesis. *Molecular & cellular proteomics*. 2006; 5:1119-1130.
30. Chandra D, Singh KK. Genetic insights into OXPHOS defect and its role in cancer. *Biochim Biophys Acta*. 2011; 1807:620-625.
31. Han Y, Xue X, Jiang M, Guo X, Li P, Liu F, Yuan B, Shen Y, Guo X, Zhi Q, Zhao H. LGR5, a relevant marker of cancer stem cells, indicates a poor prognosis in colorectal cancer patients: a meta-analysis. *Clin Res Hepatol Gastroenterol*. 2015; 39:267-273.
32. Bardelli A, Parsons DW, Silliman N, Ptak J, Szabo S, Saha S, Markowitz S, Willson JK, Parmigiani G, Kinzler KW, Vogelstein B and Velculescu VE. Mutational analysis of the tyrosine kinome in colorectal cancers. *Science*. 2003; 300:949.
33. Lu Y, Yi Y, Liu P, Wen W, James M, Wang D, You M. Common human cancer genes discovered by integrated gene-expression analysis. *PloS one*. 2007; 2:e1149.
34. Ames BN, Wakimoto P. Are vitamin and mineral deficiencies a major cancer risk? *Nature reviews Cancer*. 2002; 2:694-704.
35. Hoeijmakers JH. DNA damage, aging, and cancer. *New England Journal of Medicine*. 2009; 361:1475-1485.
36. Qi L, Chen L, Li Y, Qin Y, Pan R, Zhao W, Gu Y, Wang H, Wang R, Chen X, Guo Z. Critical limitations of prognostic signatures based on risk scores summarized from gene expression levels: a case study for resected stage I non-small-cell lung cancer. *Brief Bioinform*. 2015.
37. Barrett T, Wilhite SE, Ledoux P, Evangelista C, Kim IF, Tomashevsky M, Marshall KA, Phillippy KH, Sherman PM, Holko M, Yefanov A, Lee H, Zhang N, et al. NCBI GEO: archive for functional genomics data sets--update. *Nucleic acids research*. 2013; 41:D991-995.
38. International Cancer Genome C, Hudson TJ, Anderson W, Artez A, Barker AD, Bell C, Bernabe RR, Bhan MK, Calvo F, Eerola I, Gerhard DS, Guttmacher A, Guyer M, et al. International network of cancer genome projects. *Nature*. 2010; 464:993-998.
39. Irizarry RA, Hobbs B, Collin F, Beazer-Barclay YD, Antonellis KJ, Scherf U, Speed TP. Exploration, normalization, and summaries of high density oligonucleotide array probe level data. *Biostatistics*. 2003; 4:249-264.
40. Cancer Genome Atlas Research N. Comprehensive molecular characterization of gastric adenocarcinoma. *Nature*. 2014; 513:202-209.
41. Bahn AK. Application of binomial distribution to medicine: comparison of one sample proportion to an expected proportion (for small samples). Evaluation of a new treatment. Evaluation of a risk factor. *J Am Med Womens Assoc*. 1969; 24:957-966.
42. Benjamini A, Y H. Controlling the False Discovery Rate: A practical and Powerful Approach to Multiple Testing. *Journal of the Royal Statistical Society*. 1995; 57:289-300.
43. Zhang M, Zhang L, Zou J, Yao C, Xiao H, Liu Q, Wang J, Wang D, Wang C, Guo Z. Evaluating reproducibility of differential expression discoveries in microarray studies by considering correlated molecular changes. *Bioinformatics*. 2009; 25:1662-1668.
44. Zhang M, Yao C, Guo Z, Zou J, Zhang L, Xiao H, Wang D, Yang D, Gong X, Zhu J, Li Y, Li X. Apparently low reproducibility of true differential expression discoveries in microarray studies. *Bioinformatics*. 2008; 24:2057-2063.
45. Corder GW, Foreman DI. (2011). 8. Tests for Nominal Scale Data: Chi-Square and Fisher Exact Test: John Wiley & Sons, Inc.
46. Kanehisa M, Goto S. KEGG: kyoto encyclopedia of genes and genomes. *Nucleic acids research*. 2000; 28:27-30.
