# Supplementary material for: Differential expression analysis for individual cancer samples based on robust within-sample relative gene expression orderings across multiple profiling platforms
Source: PubMed Central journal article supplement (PMC5356599; doi:10.18632/oncotarget.11996), 2016-09-13
Supplement: oncotarget-07-68909-s001.pdf [file oncotarget-07-68909-s001.pdf]

## Differential expression analysis for individual cancer samples based on robust within-sample relative gene expression orderings across multiple profiling platforms

### SUPPLEMENTARY TABLE

**Supplementary Table S1: Reproducibility evaluation of significantly stable REOs detected in small samples for each platform**

|                   | Platform   | Normal | Number      | POG    |
|-------------------|------------|--------|-------------|--------|
| <b>Lung</b>       |            |        |             |        |
| GSE31210          | Affymetrix | 20     | 191,721,331 | 0.8923 |
| GSE31267          | Illumina   | 24     | 247,667,868 | 0.9168 |
| GSE15197          | Agilent    | 13     | 156,176,364 | 0.7923 |
| <b>Colorectal</b> |            |        |             |        |
| GSE21510          | Affymetrix | 25     | 190,854,700 | 0.9475 |
| GSE31279          | Illumina   | 32     | 135,225,886 | 0.8578 |
| GSE46271          | Agilent    | 22     | 137,856,117 | 0.8453 |

Note: POG denotes the percentage of the significantly stable REOs for the combined data for each platform are included in the corresponding small sample dataset.
